# Supplementary material
Source: publisher figshare collection journal article supplement (https://acs.figshare.com/ndownloader/files/4856275)
Supplement: Supplementary file 1 [file 4856275]

Compound	SMILES	BACE1 Ki nM	HEK293 Cell Ab40 IC50 nM	selectivity ratio BACE1/Cathepsin D
8	O=C(N(C)C(N1)=N)[C@@H]2CN(C3=NC(OC)=C(F)C=N3)C[C@@]21C4=CC(C5=CC(C#N)=CC=C5)=CS4	1.4	18	95
9 (MBi-4)	O=C(N1C)[C@H]2[C@@](CN(C3=NC(OC)=C(F)C(C)=N3)C2)(C4=CC=C(F)C=C4F)NC1=N	4.7	14	458
10	O=C(N(C)C(N1)=N)[C@@H]2CN(C3=NC(OC)=C(F)C=N3)C[C@@]21C4=CC=C(C#N)S4	57	238	93
11	O=C(N(C)C(N1)=N)[C@@H]2CN(C3=NC(OC)=C(F)C(C)=N3)C[C@@]21C4=CC=C(C#N)S4	15	40	39
12	O=C(N(C)C(N1)=N)[C@@H]2CN(C3=NC(OC)=C(F)C(C)=N3)C[C@@]21C4=CC=C(Cl)S4	10	51	70
13	O=C(N(C)C(N1)=N)[C@@H]2CN(C3=NC(OC)=C(F)C(CC)=N3)C[C@@]21C4=CC=C(Cl)S4	11	203	not determined
14	O=C(N(C)C(N1)=N)[C@@H]2CN(C3=NC(OC)=C(F)C(CCC)=N3)C[C@@]21C4=CC=C(Cl)S4	15	190	18
15	O=C(N(C)C(N1)=N)[C@@H]2CN(C3=NC(OCC)=C(F)C(C)=N3)C[C@@]21C4=CC=C(C#N)S4	48	361	>2000
16	O=C(N(C)C(N1)=N)[C@@H]2CN(C3=NC(SC)=C(F)C(C)=N3)C[C@@]21C4=CC=C(C#N)S4	45	36	5
17	O=C(N(C)C(N1)=N)[C@@H]2CN(C3=NC(NC)=C(F)C(C)=N3)C[C@@]21C4=CC=C(C#N)S4	336	157	66
18	O=C(N1C)[C@@H]2CN(C3=NC(OC)=C(F)C(C)=N3)C[C@]2(C4=CC=CC=C4)NC1=N	36	58	349
19	O=C(N1C)[C@@H]2CN(C3=NC(OC)=C(F)C(C)=N3)C[C@]2(C4=CC=CC=C4F)NC1=N	6	17	143
20	O=C(N1C)[C@@H]2CN(C3=NC(OC)=C(F)C(C)=N3)C[C@]2(C4=CC=C(F)C=C4)NC1=N	7	16	354
21	O=C(N1C)[C@@H]2CN(C3=NC(OC)=C(F)C(C)=N3)C[C@]2(C4=CC(F)=CC=C4F)NC1=N	9	28	158
22	O=C(N1C)[C@@H]2CN(C3=NC(OC)=C(F)C(C)=N3)C[C@]2(C4=CC(F)=C(F)C=C4F)NC1=N	8	35	446
23	O=C(N1C)[C@@H]2CN(C3=NC(OC)=C(F)C(C)=N3)C[C@]2(C4=C(F)C=CC=C4F)NC1=N	20	49	636
24	O=C(N1C)[C@@H]2CN(C3=NC(OC)=C(F)C(C)=N3)C[C@]2(C4=C(F)C(F)=CC=C4F)NC1=N	53	234	151
25	O=C(N1C)[C@@H]2CN(C3=NC(OC)=C(F)C(C)=N3)C[C@]2(C4=C(F)C(F)=C(F)C=C4F)NC1=N	30	93	99
